# Supplementary material
Source: Springer Nature journal article supplement (https://www.springermedizin.de/resource/supplementary/12889_2013_5746_MOESM1_ESM.pdf/9496148)
Supplement: MOESM1 [file 9496148]

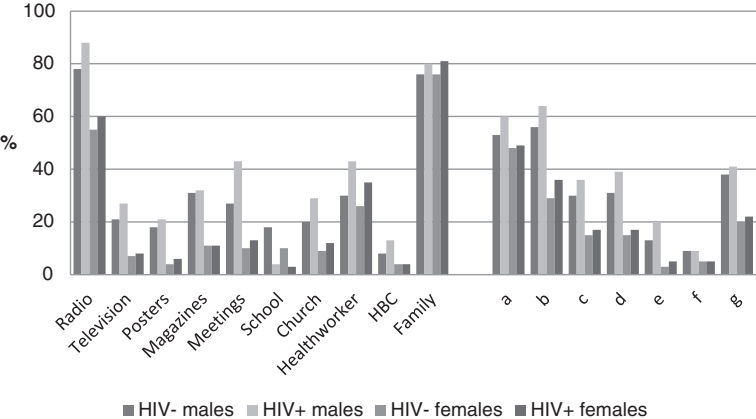

a = having sex with a casual / high risk partner

b = having sex without a condom

c = unsafe blood transfusion

d = unsterile injections

e = mother to child transmission

f = incisions on the body

g = sharing personal items
